# Supplementary material
Source: publisher figshare collection journal article supplement (https://acs.figshare.com/ndownloader/files/3975169)
Supplement: Supplementary file 1 [file 3975169]

Photomicrograph (crossed nicols) of detrital muscovite that links quartz grains in flexible sandstone (var. itacolumite). Note that the muscovite (up to 0.5 mm long) is unstrained whereas the quartz shows a strained lattice. The quartz grains have dissolved adjacent to the muscovite, but quartz-quartz boundaries are formed by intersecting quartz overgrowths. Sample from Appalachian mountain area, USA. UCSB Earth Science collection. (unpublished photomicrograph from J.R.Boles, UCSB Earth Science, edited by Dong Woog Lee, UCSB Chemical Engineering).
